# Supplementary material
Source: PubMed Central journal article supplement (PMC2841495)
Supplement: 00167.2009_1.pdf [file 00167.2009_1.pdf]

# 1 **Supplementary Figures and Tables**

## 2 **Supplementary Figure 1**

### 3 **A. PCA of genes affected by smoking in bronchial and nasal samples in an**

4 **independent U133A dataset.** Probesets for 85 of the 119 genes found to be

5 differentially expressed by smoking independently of collection site in the matched

6 bronchus and nose Exon array dataset were found on the U133A array. The expression

7 profiles of these probesets distinguish smokers from nonsmokers in both bronchus and

8 nose in an independent U133A dataset. Each point represents a subject (red: smokers,

9 blue: nonsmokers). There are 23 nonsmokers in blue and 34 smokers in red from U133A

10 bronchial dataset, and 8 non-smokers and 7 smokers from U133A nasal dataset.

11

### 12 **B. PCA of genes previously identified to be affected by smoking in bronchial airway**

13 **in the current Exon array dataset.** Probesets for 71 of the 97 genes found to be

14 differentially expressed by smoking in our previous U133A bronchial epithelium dataset

15 (Spira et al 2004), were found on the Exon array. The expression profiles of these

16 probesets distinguish smokers from nonsmokers in both bronchus and nose in the Exon

17 dataset. Each point represents a subject (red: smokers, blue: nonsmokers). There are 13

18 nonsmokers and 13 smokers in bronchus, and 14 non-smokers and 13 smokers in nose.

19

A

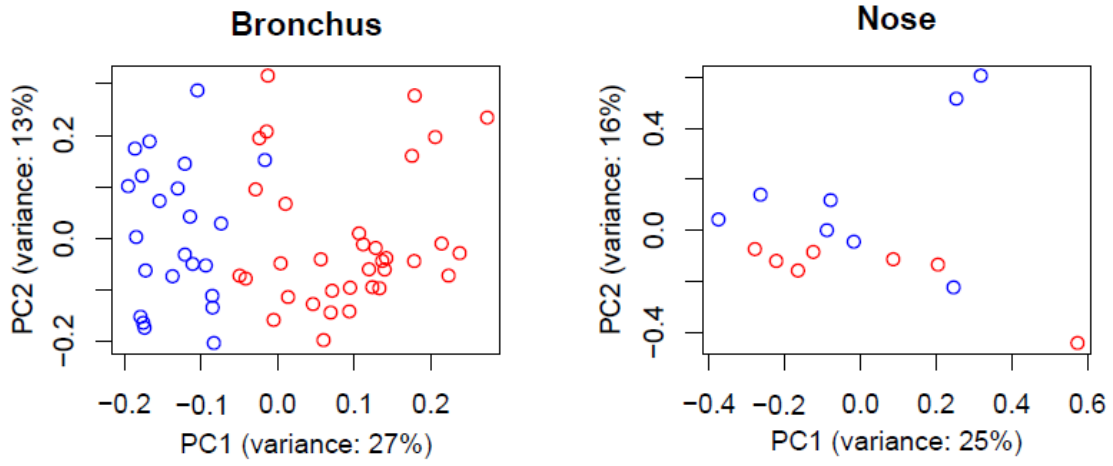

B

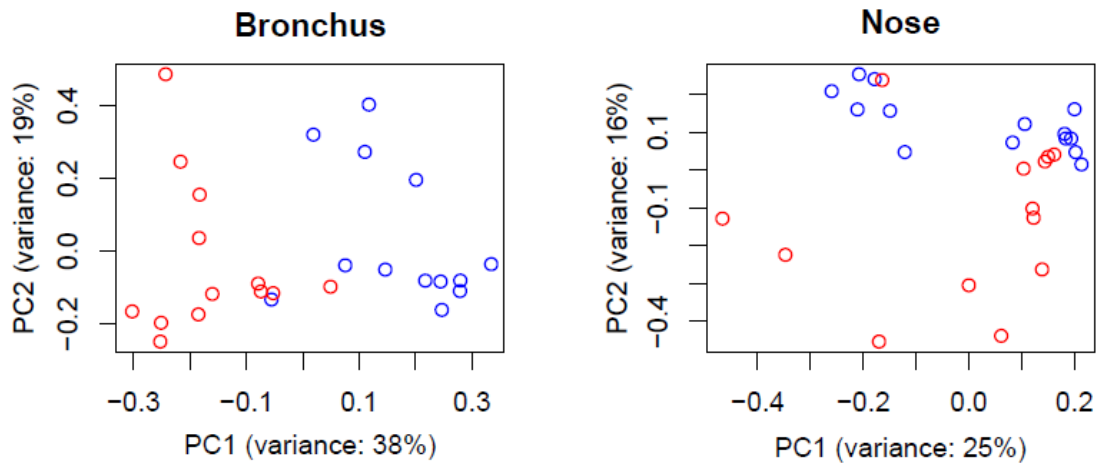

20

21

22

23

24

25

26

27

28 **Supplementary Figure 2**

29 RT-PCR validation of genes that are more dramatically affected by smoking in nose or  
30 bronchus. Error bars indicate standard error. P-values indicate the Student's t-test  
31 between the relative expression differences in 3 smokers versus 3 nonsmokers  
32 respectively.

33

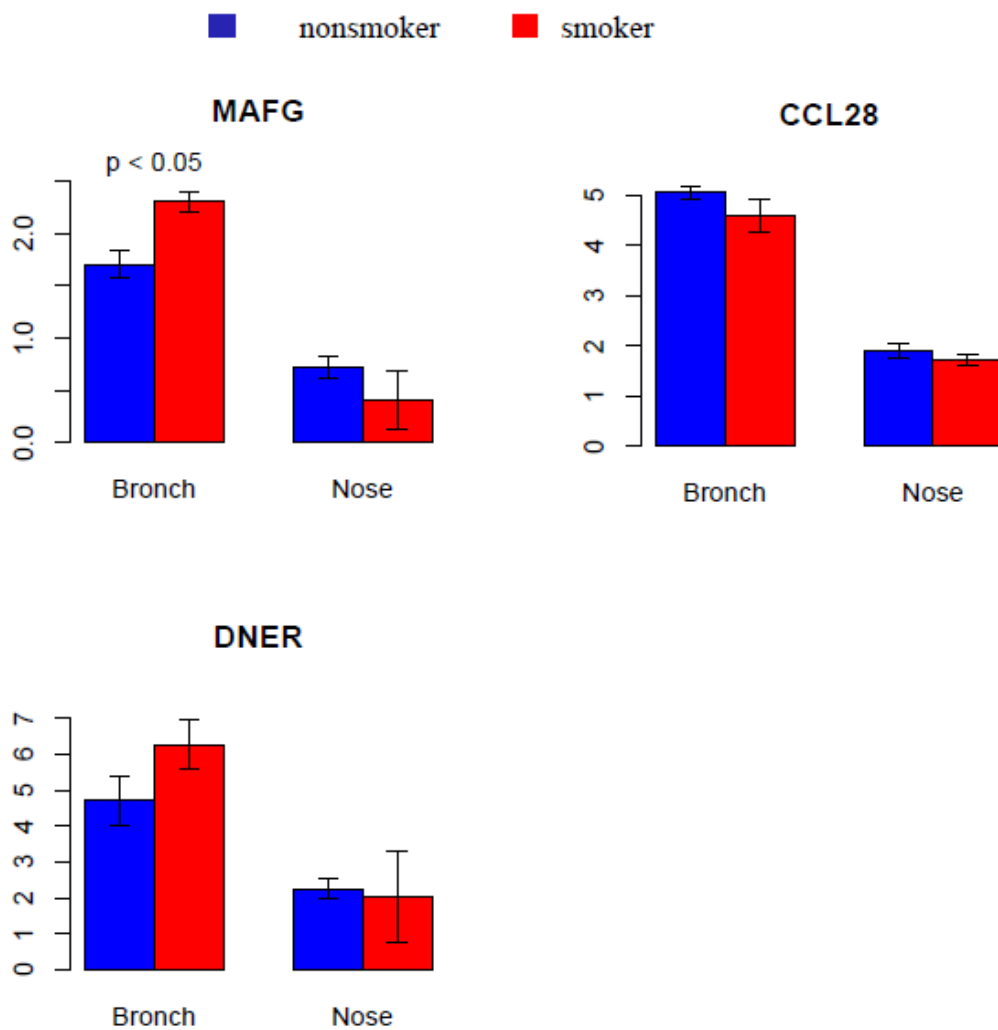

34

35

36

37 **Supplementary Table 1**

38 Study information including the present study and other two studies.

|            | Present Study   |      | Spira et al. 2004 <sup>(1)</sup> | Sridhar et al. 2008 <sup>(2)</sup><br>(unmatched subjects) |      |
|------------|-----------------|------|----------------------------------|------------------------------------------------------------|------|
|            | Bronchus        | Nose | Bronchus                         | Bronchus                                                   | Nose |
| nonsmokers | 14 <sup>#</sup> | 14   | 23*                              | 23*                                                        | 8    |
| smokers    | 13              | 13   | 34*                              | 34*                                                        | 7    |

39 # One bronchial sample from one never smoker was identified as an outlier and excluded from  
40 the analysis

41 \*These samples represent the same data.

42

43 **Supplementary Table 2**

44 Primer sequences for candidate genes and a control gene (GAPDH).

| gene    | Forward                          | Reverse                    |
|---------|----------------------------------|----------------------------|
| CYP1B1  | TATGCAGGAGCTTCTGGGAGA            | TGGGCCCTTTAAGTCTTTGACTC    |
| CYP1A1  | CATGCTGACCCTGGGAAAGA             | TGGCTCATCCTTGACAGTGC       |
| AKR1B10 | AGATCACAGTGAACCTTAGTCCTGTTATAGAC | AAAACAGCACCTCGATTCTCGT     |
| TMEM45A | AGCGAACCTGCTATCTTGGTTC           | CCCTCCAAAATTTCCAATCGAT     |
| SEC14L3 | CCACTTCCCTTGTTGCACATAG           | TGCTTCCAGGAAAGTCCCTAAA     |
| MAFG    | CACCAGCGTCATCACAATAGTAAAG        | CCCTACGATCGGGCATCC         |
| CCL28   | CACACCTTTTATCCCAGCACTTC          | TCAAGTGATCCTCCTGCCTCA      |
| DNER    | GTTTGAGTGCCGGCTTTCTG             | TGCTACGTTACGTGGTTTTTCCTAAC |
| GAPDH   | TGCACCACCAACTGCTTAGC             | GGCATGGACTGTGGTCATGAG      |

45

46

47 **Supplementary Table 3**

48 GO molecular function categories, human KEGG pathways, and GenMAPP pathways  
 49 over-represented among 119 genes commonly changed by smoking in bronchus and nose  
 50 compared to all annotated genes on the human exon arrays (FDR < 0.05).

| Category        | Term                                                                                                                                                                                                                  | Count | PValue   | Benjamini |
|-----------------|-----------------------------------------------------------------------------------------------------------------------------------------------------------------------------------------------------------------------|-------|----------|-----------|
| SP_PIR_KEYWORDS | microsome                                                                                                                                                                                                             | 9     | 2.10E-07 | 1.12E-04  |
| SP_PIR_KEYWORDS | oxidoreductase                                                                                                                                                                                                        | 17    | 1.59E-07 | 1.70E-04  |
| GOTERM_MF_ALL   | GO:0050381~unspecific<br>monooxygenase activity                                                                                                                                                                       | 6     | 2.96E-07 | 8.53E-04  |
| GOTERM_MF_ALL   | GO:0016712~oxidoreductase activity,<br>acting on paired donors, with<br>incorporation or reduction of molecular<br>oxygen, reduced flavin or flavoprotein<br>as one donor, and incorporation of one<br>atom of oxygen | 6     | 1.04E-06 | 0.001491  |
| SP_PIR_KEYWORDS | iron                                                                                                                                                                                                                  | 10    | 1.48E-05 | 0.003151  |
| INTERPRO        | IPR002401:Cytochrome P450, E-class,<br>group I                                                                                                                                                                        | 7     | 5.53E-07 | 0.003268  |
| SP_PIR_KEYWORDS | nadp                                                                                                                                                                                                                  | 8     | 1.35E-05 | 0.003583  |
| SP_PIR_KEYWORDS | monooxygenase                                                                                                                                                                                                         | 7     | 1.13E-05 | 0.004004  |
| GOTERM_CC_ALL   | GO:0042598~vesicular fraction<br>GO:0016705~oxidoreductase activity,<br>acting on paired donors, with<br>incorporation or reduction of molecular<br>oxygen                                                            | 9     | 1.44E-05 | 0.006241  |
| GOTERM_MF_ALL   | GO:0016491~oxidoreductase activity                                                                                                                                                                                    | 18    | 1.49E-05 | 0.008559  |
| GOTERM_MF_ALL   | GO:0005506~iron ion binding                                                                                                                                                                                           | 11    | 1.31E-05 | 0.009402  |
| GOTERM_CC_ALL   | GO:0005792~microsome                                                                                                                                                                                                  | 9     | 1.18E-05 | 0.010148  |
| INTERPRO        | IPR001128:Cytochrome P450                                                                                                                                                                                             | 7     | 3.62E-06 | 0.010668  |
| SP_PIR_KEYWORDS | heme                                                                                                                                                                                                                  | 7     | 1.00E-04 | 0.017638  |
| GOTERM_CC_ALL   | GO:0000267~cell fraction                                                                                                                                                                                              | 18    | 7.74E-05 | 0.022134  |
| GOTERM_MF_ALL   | GO:0004497~monooxygenase activity                                                                                                                                                                                     | 7     | 6.01E-05 | 0.028437  |
| SP_PIR_KEYWORDS | pentose phosphate pathway                                                                                                                                                                                             | 3     | 1.98E-04 | 0.029716  |
| GOTERM_MF_ALL   | GO:0020037~heme binding                                                                                                                                                                                               | 7     | 1.83E-04 | 0.043602  |
| GOTERM_MF_ALL   | GO:0046906~tetrapyrrole binding                                                                                                                                                                                       | 7     | 1.83E-04 | 0.049602  |

51

52

53

#### 54 **Supplementary Table 4**

55 At FDR <0.05 and |fold-change| > 0.5, 119 genes that vary in expression between

56 smokers and nonsmokers were identified using a linear mixed-effects model including

57 bronchus and nose samples (see Figure 2). The log2 fold change was measured by the  
 58 regression coefficient  $\beta_{status}$  between non-smokers and smokers when the site effect is  
 59 fixed.

| Transcript_Id | GeneSymbol | FoldChange(nonsmoker/smoker) | rawPvalue |
|---------------|------------|------------------------------|-----------|
| 3833948       | CYP2A13    | 1.005                        | 7.36E-11  |
| 3333488       | SCGB1A1    | 0.922                        | 7.75E-10  |
| 3625052       | WDR72      | -0.606                       | 8.11E-10  |
| 2548699       | CYP1B1     | -3.204                       | 9.59E-10  |
| 2319802       | PGD        | -0.653                       | 5.40E-09  |
| 3614774       | OCA2       | -0.738                       | 8.21E-09  |
| 2800711       | ADCY2      | 0.817                        | 1.49E-08  |
| 4000560       | PIR        | -1.012                       | 3.15E-08  |
| 3316208       | TALDO1     | -0.633                       | 1.01E-07  |
| 3649890       | ABCC1      | -0.528                       | 1.54E-07  |
| 2599993       | ABCB6      | -0.607                       | 3.70E-07  |
| 2711034       | C3orf59    | -0.596                       | 5.49E-07  |
| 2786322       | SLC7A11    | -1.578                       | 6.98E-07  |
| 2973995       | EPB41L2    | 0.681                        | 1.39E-06  |
| 3662201       | MT1H       | 0.715                        | 1.48E-06  |
| 2633691       | TMEM45A    | 1.341                        | 2.02E-06  |
| 3518418       | KCTD12     | 0.739                        | 2.04E-06  |
| 4025339       | IDS        | -0.562                       | 2.53E-06  |
| 3652867       | SCNN1G     | 1.094                        | 3.46E-06  |
| 2696040       | RAB6B      | 0.74                         | 3.52E-06  |
| 3722129       | CNTD1      | 0.772                        | 3.57E-06  |
| 3025433       | AKR1B10    | -1.806                       | 3.86E-06  |
| 2487918       | ATP6V1B1   | 0.896                        | 4.03E-06  |
| 3726298       | TMEM92     | -0.52                        | 4.42E-06  |
| 2913694       | CD109      | -0.877                       | 4.76E-06  |
| 3894545       | SDCBP2     | -0.647                       | 5.40E-06  |
| 3540155       | C14orf50   | 0.655                        | 5.43E-06  |
| 3138464       | PDE7A      | 0.521                        | 5.46E-06  |
| 4013549       | ITM2A      | 0.98                         | 5.75E-06  |
| 2734047       | AGPAT9     | -0.54                        | 6.29E-06  |
| 2517588       | OSBPL6     | 0.864                        | 6.78E-06  |
| 3894322       | SRXN1      | -0.643                       | 6.93E-06  |
| 2908423       | SLC29A1    | 0.634                        | 6.96E-06  |
| 3957341       | SEC14L3    | 1.792                        | 7.02E-06  |
| 3884830       | PPP1R16B   | 0.823                        | 8.30E-06  |
| 3497195       | CLDN10     | -1.008                       | 9.23E-06  |
| 2587790       | GPR155     | 0.598                        | 9.67E-06  |
| 3429460       | TXNRD1     | -0.661                       | 1.05E-05  |
| 2814756       | MAP1B      | -0.67                        | 1.26E-05  |
| 3818091       | TMEM146    | 0.804                        | 1.28E-05  |
| 3692999       | MT1G       | 1.073                        | 1.31E-05  |
| 3219621       | CTNNA1     | 0.858                        | 1.55E-05  |

|         |           |        |          |
|---------|-----------|--------|----------|
| 3247818 | BICC1     | 0.711  | 1.58E-05 |
| 3611625 | ALDH1A3   | -0.629 | 1.92E-05 |
| 3335029 | POLA2     | 0.547  | 2.22E-05 |
| 3791850 | SERPINB13 | -0.794 | 2.53E-05 |
| 2685304 | PROS1     | 0.98   | 2.58E-05 |
| 2554018 | EFEMP1    | 0.609  | 2.59E-05 |
| 2739308 | EGF       | -0.686 | 2.91E-05 |
| 3604147 | KIAA1199  | -0.584 | 2.93E-05 |
| 3013255 | PEG10     | 0.581  | 3.10E-05 |
| 3061805 | SGCE      | 0.535  | 3.16E-05 |
| 3633081 | CYP1A1    | -2.141 | 3.18E-05 |
| 3424218 | ACSS3     | 0.829  | 3.34E-05 |
| 3623031 | FBN1      | 0.676  | 3.46E-05 |
| 3012064 | PFTK1     | 0.503  | 3.71E-05 |
| 3766013 | 10-Mar    | 0.607  | 3.92E-05 |
| 3943504 | TIMP3     | -0.848 | 4.14E-05 |
| 2890741 | SCGB3A1   | 0.564  | 4.28E-05 |
| 4027416 | G6PD      | -0.636 | 4.29E-05 |
| 2678448 | FAM107A   | 0.739  | 4.71E-05 |
| 2546795 | CAPN13    | 0.696  | 5.01E-05 |
| 2533019 | UGT1A9    | -0.56  | 5.15E-05 |
| 2334986 | CYP4X1    | 0.501  | 5.27E-05 |
| 2415266 | CYP2J2    | 0.616  | 5.58E-05 |
| 2511603 | GALNT5    | -0.584 | 6.69E-05 |
| 3144346 | RUNX1T1   | 0.575  | 7.68E-05 |
| 2414440 | C1orf168  | 0.756  | 7.79E-05 |
| 2939593 | PECI      | 0.718  | 8.07E-05 |
| 3089469 | SORBS3    | 0.502  | 8.83E-05 |
| 3726691 | ABCC3     | -0.563 | 9.08E-05 |
| 3732092 | CACNG4    | -0.732 | 9.27E-05 |
| 3379597 | MTL5      | 0.515  | 9.43E-05 |
| 3103293 | RDH10     | -0.521 | 9.95E-05 |
| 3356038 | TMEM45B   | -0.564 | 1.03E-04 |
| 3950602 | PANX2     | -0.562 | 1.09E-04 |
| 3136888 | TOX       | 0.607  | 1.10E-04 |
| 3429555 | EID3      | -0.532 | 1.21E-04 |
| 3323413 | HTATIP2   | -0.529 | 1.22E-04 |
| 3375648 | FTH1      | -0.665 | 1.37E-04 |
| 3108648 | C8orf47   | 0.573  | 1.40E-04 |
| 2772450 | SULT1E1   | 0.654  | 1.42E-04 |
| 2838116 | FABP6     | 0.86   | 1.47E-04 |
| 2866225 | MEF2C     | 0.523  | 1.56E-04 |
| 3864375 | LYPD3     | -0.731 | 1.58E-04 |
| 3381879 | P4HA3     | 0.507  | 1.72E-04 |
| 2811145 | PART1     | 0.735  | 1.76E-04 |
| 2790324 | RNF175    | -0.642 | 1.98E-04 |
| 3782088 | CABYR     | -0.685 | 2.03E-04 |
| 2856044 | EMB       | 0.544  | 2.04E-04 |
| 3823304 | CYP4F3    | -0.596 | 2.14E-04 |
| 3566495 | C14orf37  | 0.619  | 2.14E-04 |

|         |          |        |          |
|---------|----------|--------|----------|
| 3484165 | C13orf26 | 0.771  | 2.17E-04 |
| 3494629 | SCEL     | -0.844 | 2.19E-04 |
| 4000538 | FIGF     | -0.525 | 2.20E-04 |
| 3061621 | TFPI2    | 0.624  | 2.21E-04 |
| 2431886 | PDE4DIP  | 0.575  | 2.25E-04 |
| 3343293 | CCDC81   | 0.648  | 2.61E-04 |
| 3596147 | GCNT3    | -0.655 | 2.72E-04 |
| 3450775 | KIF21A   | 0.517  | 2.82E-04 |
| 3844781 | PRG2     | 0.671  | 3.14E-04 |
| 3998766 | KAL1     | 0.565  | 3.20E-04 |
| 3189311 | PBX3     | 0.553  | 3.42E-04 |
| 3638607 | ANPEP    | 0.634  | 3.89E-04 |
| 2898597 | GMNN     | 0.53   | 3.92E-04 |
| 2828356 | CSF2     | -0.571 | 4.15E-04 |
| 3445741 | MGP      | 0.596  | 4.36E-04 |
| 3662093 | MT3      | 0.542  | 4.36E-04 |
| 3870895 | CDC42EP5 | -1.013 | 4.81E-04 |
| 3257246 | IFIT1    | 0.73   | 4.88E-04 |
| 3190002 | TTC16    | 0.507  | 5.32E-04 |
| 3282519 | ARMC4    | 0.506  | 5.95E-04 |
| 3868857 | KLK12    | -1.132 | 6.17E-04 |
| 3853658 | CYP4F11  | -0.861 | 6.26E-04 |
| 2353988 | FAM46C   | 0.54   | 6.43E-04 |
| 2343334 | GIPC2    | 0.545  | 6.64E-04 |
| 3535780 | PTGER2   | 0.616  | 6.64E-04 |
| 2881747 | ANXA6    | 0.572  | 6.76E-04 |
| 3662696 | CX3CL1   | 0.559  | 6.87E-04 |

60

## 61 References

- 62 1. Spira A, Beane J, Shah V, Liu G, Schembri F, Yang X, Palma J and Brody JS. Effects of cigarette  
63 smoke on the human airway epithelial cell transcriptome. *Proc Natl Acad Sci U S A* 101: 10143-  
64 10148, 2004.
- 65 2. Sridhar S, Schembri F, Zeskind J, Shah V, Gustafson AM, Steiling K, Liu G, Dumas YM, Zhang  
66 X, Brody JS, Lenburg ME and Spira A. Smoking-induced gene expression changes in the  
67 bronchial airway are reflected in nasal and buccal epithelium. *BMC Genomics* 9: 259, 2008.
